# Supplementary material
Source: publisher site journal article supplement (https://www.spandidos-publications.com/1271/downloadSupplementary)

Figure S1. Expression levels of MMP-9 and TIMP-1 in murine H22 cells treated with 4,4'-bond secalonic acid D were detected by western blotting. MMP, matrix metalloproteinase; TIMP-1, tissue inhibitors of metalloproteinases.

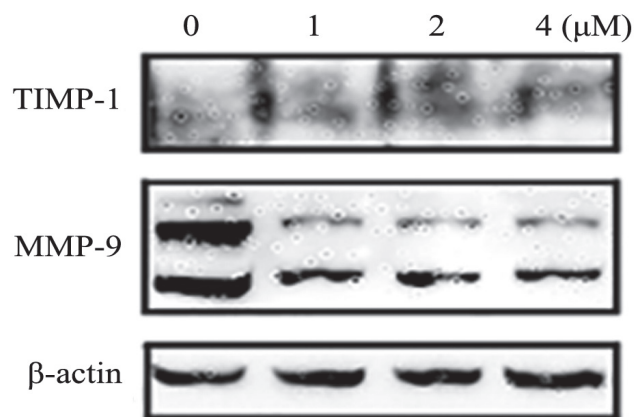

Supplement: Supplementary file 1 [file downloadSupplementary]
